# Supplementary material for: ADAR1 protects pulmonary macrophages from sepsis-induced pyroptosis and lung injury through miR-21/A20 signaling
Source: PubMed Central journal article supplement (PMC10758098; doi:10.7150/ijbs.86424), 2024-01-01
Supplement: ijbsv20p0464s1.pdf [file ijbsv20p0464s1.pdf]

# Supplementary Material

## Supplementary Figures

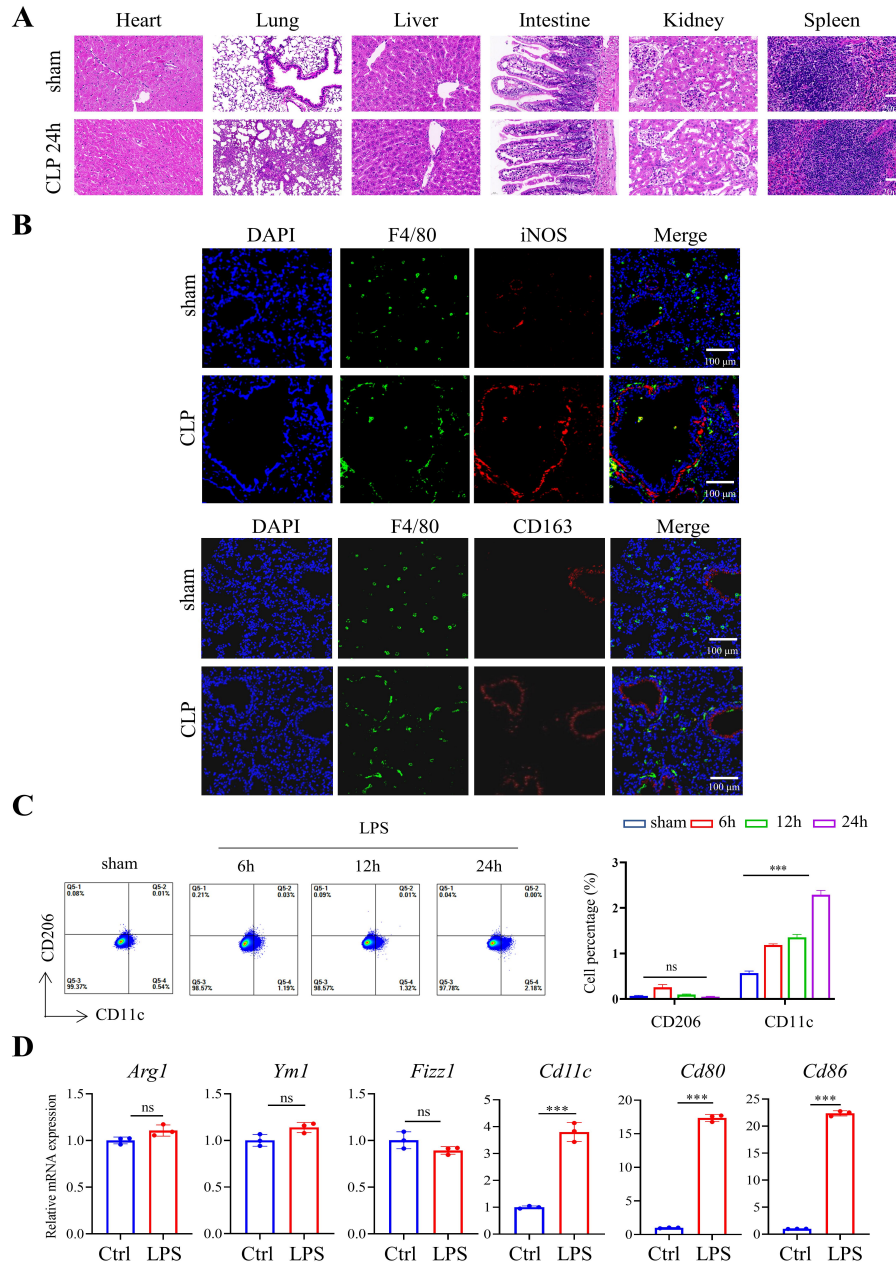

Fig.S1

**Supplementary Figure 1. CLP-induced organ pathological injuries in mice and macrophage polarization in lung tissues of CLP mice and RAW264.7 cells after LPS.** (A), Representative HE images of mice heart, lung, liver, intestine, kidney, and spleen tissues after CLP treatment for 24 h. N=6. Scale bar means 20  $\mu$ m. (B), Representative immunofluorescence images of double staining of F4/80 and iNOS (M1 marker) or CD163 (M2 marker) in murine lung tissues after CLP. N=6. Scale bar means 100  $\mu$ m. (C), Flow cytometry of RAW264.7 cells with LPS stimulation over time showing cell percentage of CD11c (M1 marker) and CD206 (M2 marker) positive cells. N=3. (D), qRT-PCR was used to assess the expression of M1 and M2 polarization in Raw 264.7 cells stimulated by LPS. N=3. Data were shown as mean  $\pm$  SD. \*\*\* $P$  < 0.001, ns=no statistical significance (sham versus LPS-24h).

**A**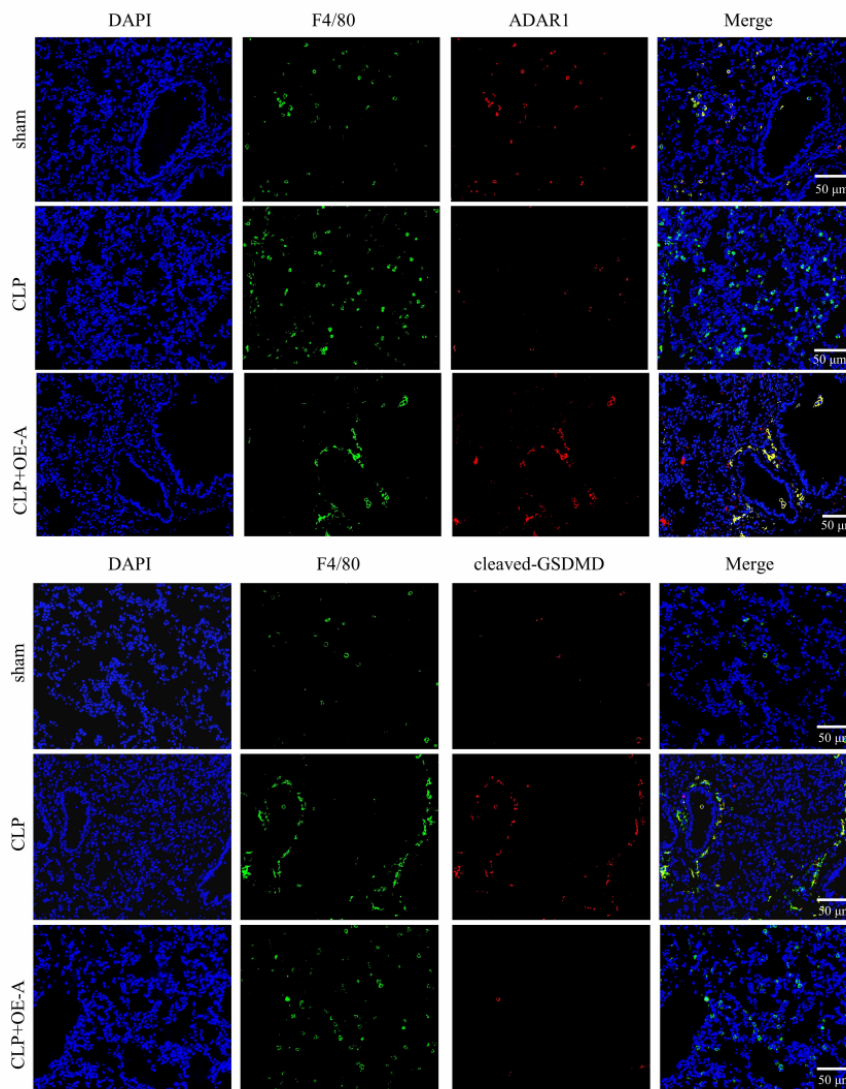**B**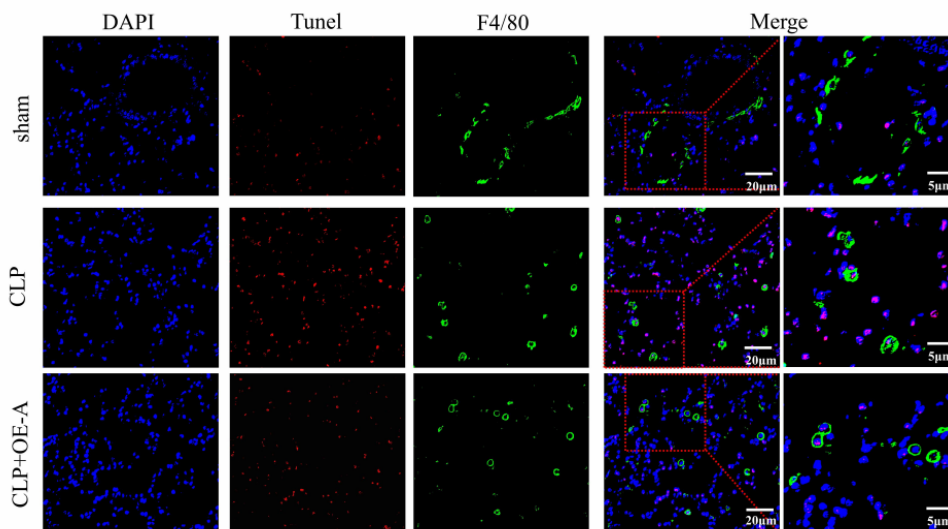

**Supplementary Figure 2. Overexpression of ADAR1 alleviated CLP-induced pyroptosis and cell death in mice.** (A), Double staining of F4/80 (green) and ADAR1 (red), as well as F4/80 (green) and cleaved-GSDMD (red) in murine lung tissues after CLP with or without ADAR1-overexpressing adenovirus infection. DAPI is blue. N=3. Scale bar means 50 μm. (B), Immunofluorescence staining of tunel (red) and F4/80 (green) in the three groups. DAPI is blue. N=3. Scale bar means 20 μm.

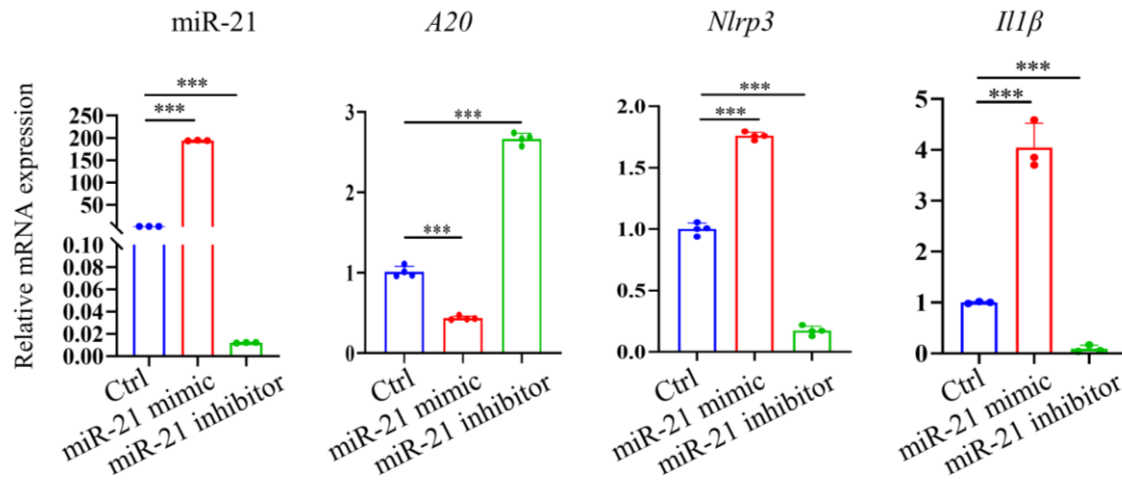

**Supplementary Figure 3. ADAR1/miR-21/A20 signaling in RAW264.7 cells.** RAW264.7 cells were transfected with miR-21 mimic or inhibitors, and relative mRNA levels of miR-21, A20, NLRP3, and IL-1β were detected via RT-qPCR. N=3. Data were shown as mean ± SD. \*P< 0.05, \*\*P< 0.01, \*\*\*P< 0.001.

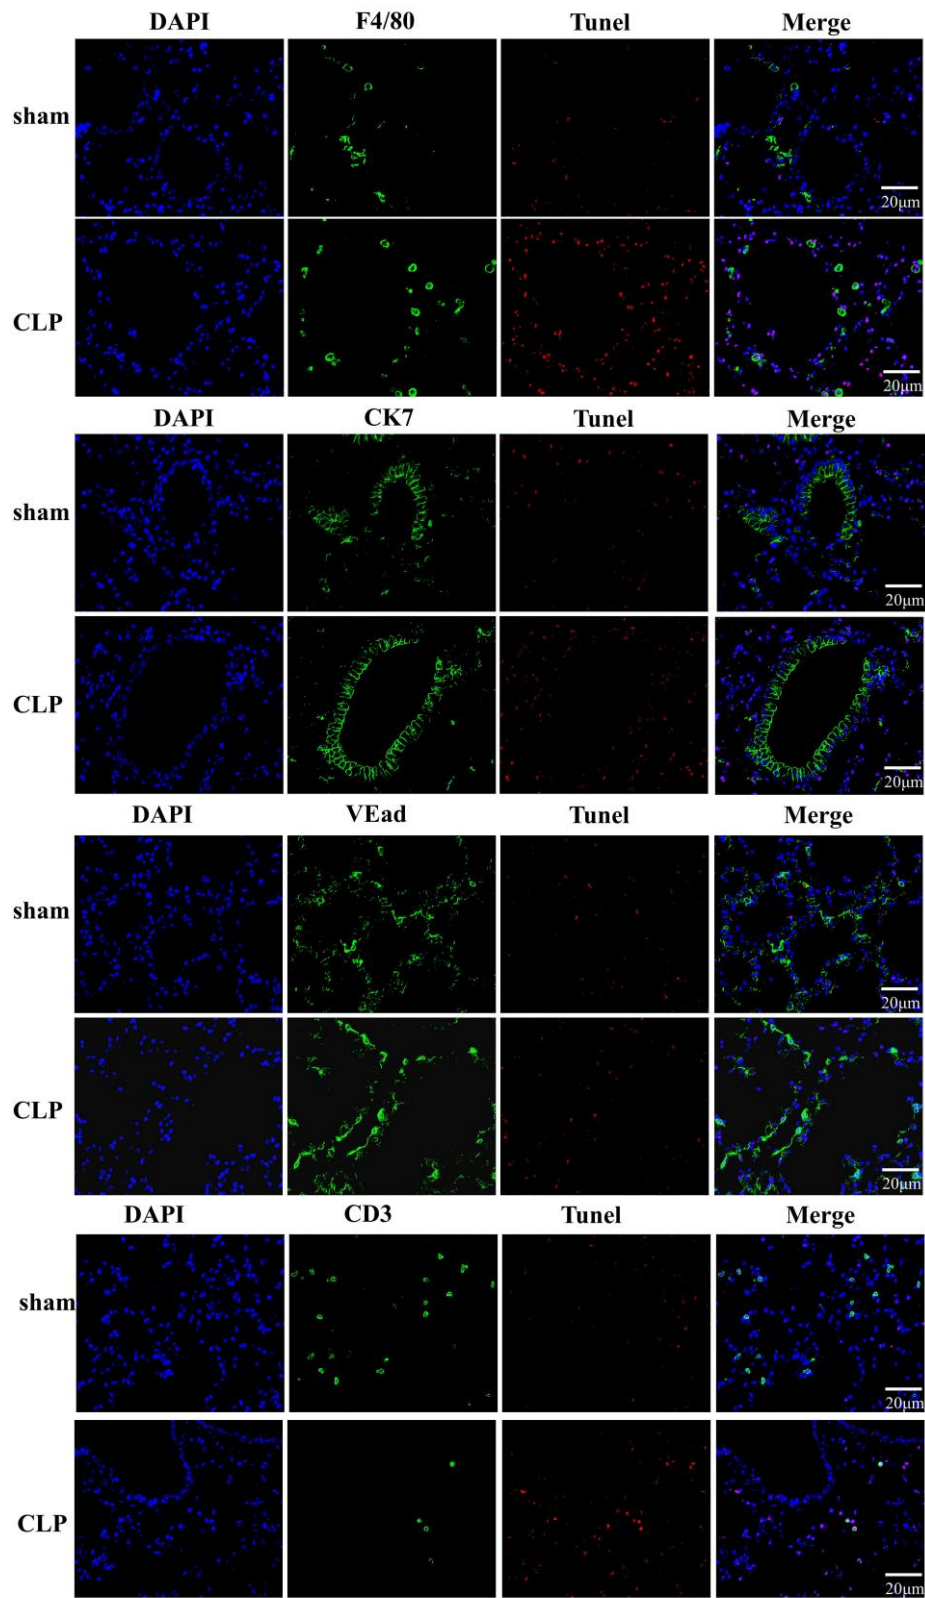

**Supplementary Figure 4 Cell death of different cells in mice septic model.** Double staining of F4/80 (green, macrophages), CK7 (green, epithelial cells), CD3 (green, T lymphocytes), VEad (green, endotheliocytes), and tunel (red) in the mice lung tissues of sham and CLP mice models (24 h). DAPI is blue. N=6. Scale bar means 20 μm.

**Supplementary Table 1.** Primer sequences used in RT-qPCR.

| Gene            | Forward (5'-3')         | Reverse (5'-3')          |
|-----------------|-------------------------|--------------------------|
| <i>ADAR1</i>    | CTGAGACCAAAGAAACGCAGA   | GCCATTGTAATGAACAGGTGGTT  |
| <i>A20</i>      | CACACAAAGCACCTCAAGGC    | GTTGGGATGCTGACACTCCA     |
| <i>NLRP3</i>    | GATCTTCGCTGCGATCAACAG   | CGTGCATTATCTGAACCCAC     |
| <i>IL1</i>      | TGGCATTGATCTGGTTCATC    | GTTTAGGAATCTTCCCCTT      |
| <i>IL4</i>      | AACGGCTCGACAGGAACCT     | CTCTGGTTGGCTTCCTTCACA    |
| <i>IL6</i>      | GACAGCCACTCACCTCTTCA    | TTCACCAGGCAAGTCTCCTC     |
| <i>IL10</i>     | AGGGCACCCAGTCTGAGAACA   | CGGCCTTGCTCTTGTTTTAC     |
| <i>GADPH</i>    | AGAAGGCTGGGGCTCATTG     | AGGGGCCATCCACAGTCTTC     |
| <i>Adar1</i>    | CCGTACCATGTCCTGTAGTGACA | GCCCTTGGCTGAAAAGGTAAC    |
| <i>A20</i>      | GAACAGCGATCAGGCCAGG     | GGACAGTTGGGTGTCTCACATT   |
| <i>Nlrp3</i>    | TGGTGACTTTGTATATGCGTG   | CTTAGGTCCACACAGAAAGT     |
| <i>Il1β</i>     | CAGGATGAGGACATGAGCACC   | CTCTGCAGACTCAAACCTCCAC   |
| <i>Il6</i>      | TGCTGGTGACAACCACGGC     | GTACTCCAGAAGACCAGAGG     |
| <i>Il10</i>     | GCCAGAGCCACATGCTCCTA    | GATAAGGCTTGGCAACCCAAGTAA |
| <i>Tnf</i>      | CGTCAGCCGATTTGCTATCT    | CGGACTCCGCAAAGTCTAAG     |
| <i>Caspase1</i> | AGGCACGGGACCTATGTGAT    | AGGGCAAACTTGAGGGTCC      |
| <i>Gsdmd</i>    | GATCAAGGAGGTAAGCGGCA    | AACACTCCGGTTCTGGTTCT     |
| <i>Smad7</i>    | AGGCTGTGTTGCTGTGAATCTTA | TGGGTATCTGGAGTAAGGAGGAG  |
| <i>Pten</i>     | CATTGCCTGTGTGTGGTGATATC | TCCTCTGGTCCTGGTATGAAGAA  |
| <i>Bax</i>      | ACCAGGGTGGCTGGGAAG      | CCTTCCCCTTCCCCCATTC      |
| <i>Pcd4</i>     | TCTGAAGCTGAACACTGCCTTAA | TGCACTTTCTCCAGTTGACTCTAA |
| <i>Ccr7</i>     | CAGGTGTGCTTCTGCCAAGAT   | GGTAGGTATCCGTCATGGTCT    |
| <i>Gapdh</i>    | GGTGAAGGTCGGTGTGAACG    | CTCGCTCCTGGAAGATGGTG     |
